# Supplementary material for: Kunitz type protease inhibitor EgKI-1 from the canine tapeworm Echinococcus granulosus as a promising therapeutic against breast cancer
Source: PubMed Central journal article supplement (PMC6118354; doi:10.1371/journal.pone.0200433), 2018-08-31
Supplement: pone.0200433.s004.pdf [file pone.0200433.s004.pdf]

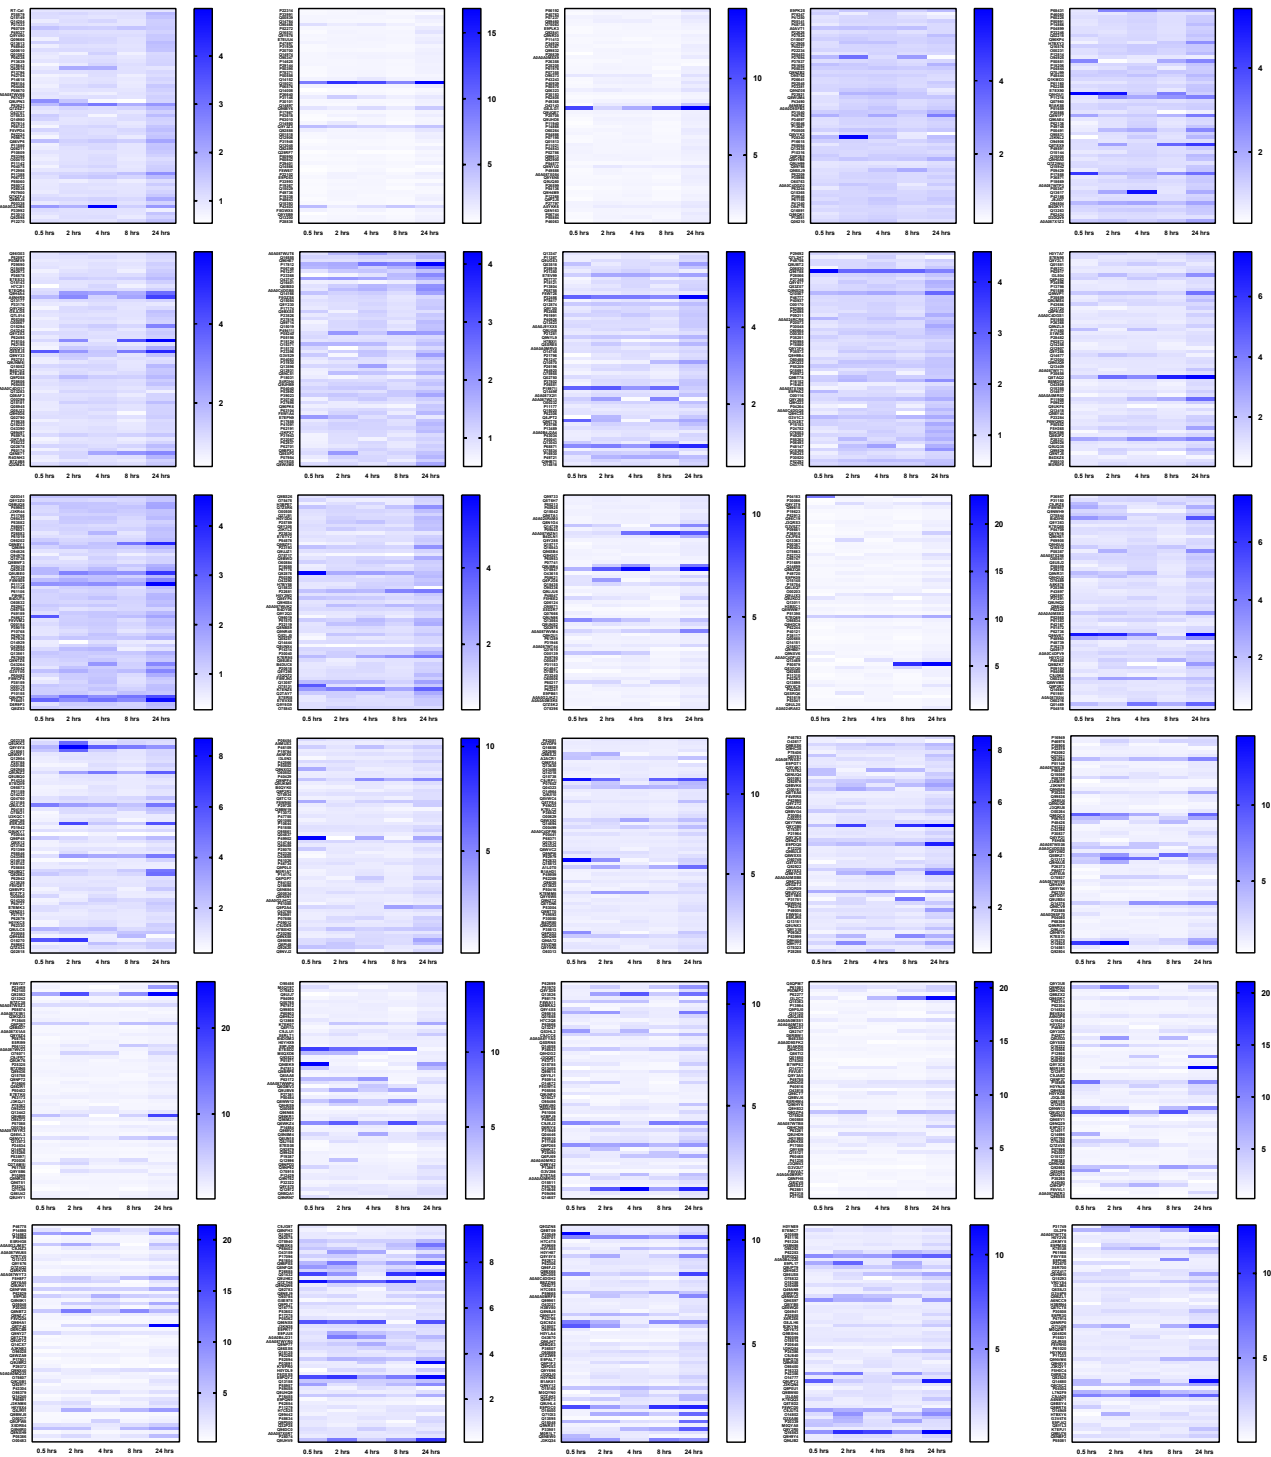

Supplementary Figure S4
